# Supplementary material for: New estimates indicate that males are not larger than females in most mammal species
Source: PubMed Central journal article supplement (PMC10933400; doi:10.1038/s41467-024-45739-5), 2024-03-12
Supplement: 41467_2024_45739_MOESM1_ESM.pdf [file 41467_2024_45739_MOESM1_ESM.pdf]

# New estimates indicate that males are not larger than females in most mammal species

Kaia J. Tombak, Severine B. S. W. Hex, Daniel I. Rubenstein

## Supplementary Figures and Tables

**Supplementary Fig. 1. Sample size and absolute confidence interval of the intersexual mass difference, relative to mean body mass, for each sex (males in the top panel, females in the bottom panel, N=691 mammal populations in each), with the elbow of the curve marked in red. The elbow was used to determine the minimum sample size for a datapoint to be included in analyses (N=9 males and 9 females).**

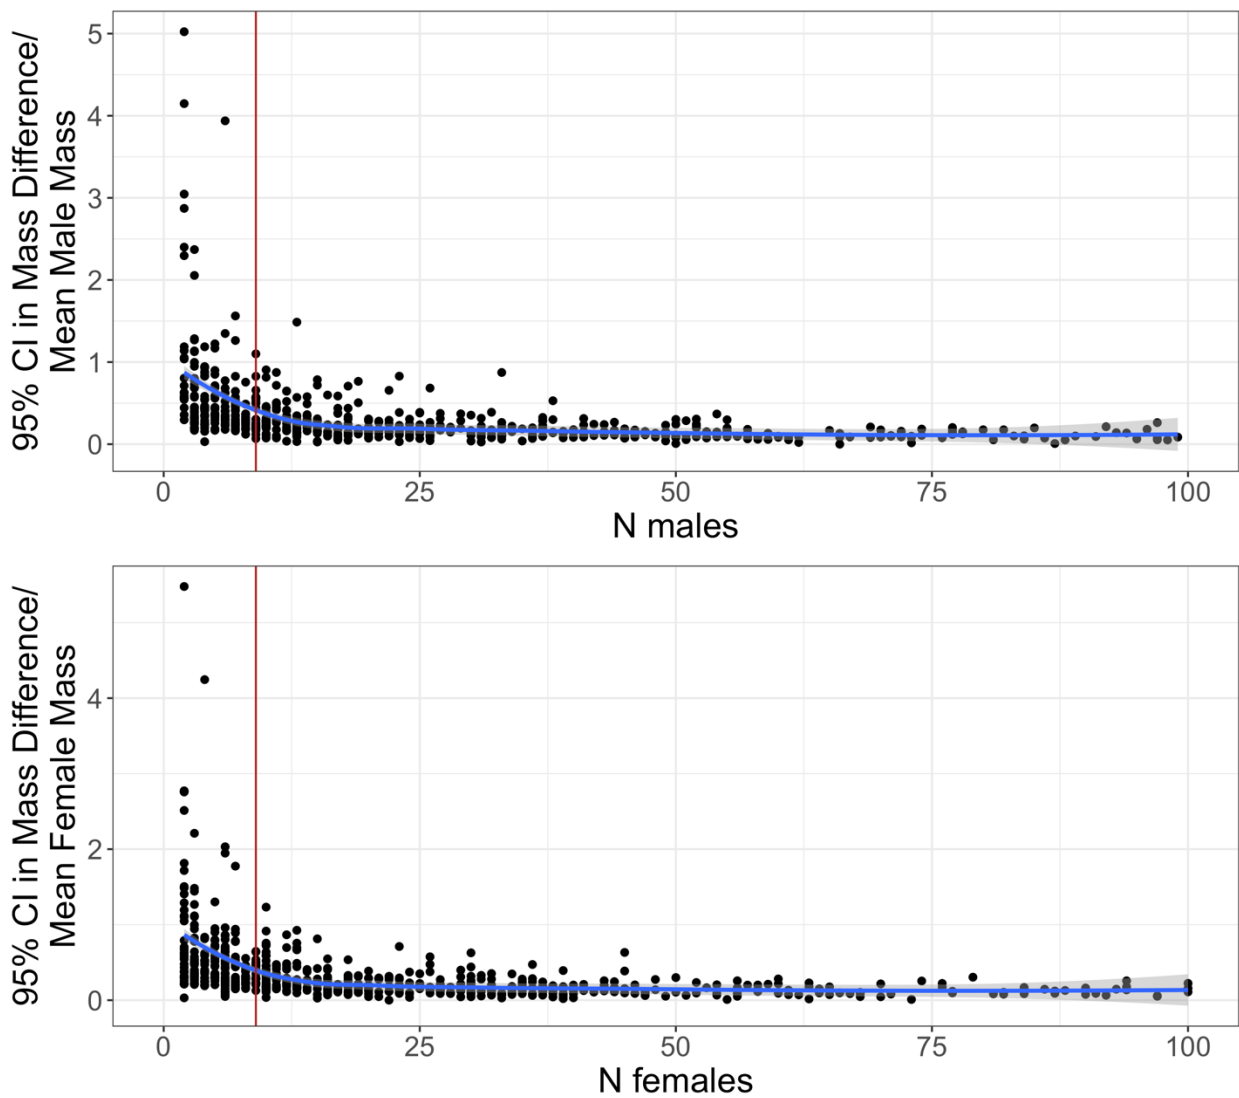

**Supplementary Fig. 2. Observed distribution of sexual size dimorphism across mammalian families in each order (only families with at least ten species are shown, in addition to the Pilosa families sampled). Filled bars show the number of species in each category in our dataset, and floating pink bars demarcate the 5% representation goal (i.e., the maximum number of species included in each rate estimation). Please see Supplementary Table 1 for the sample sizes for each family sampled.**

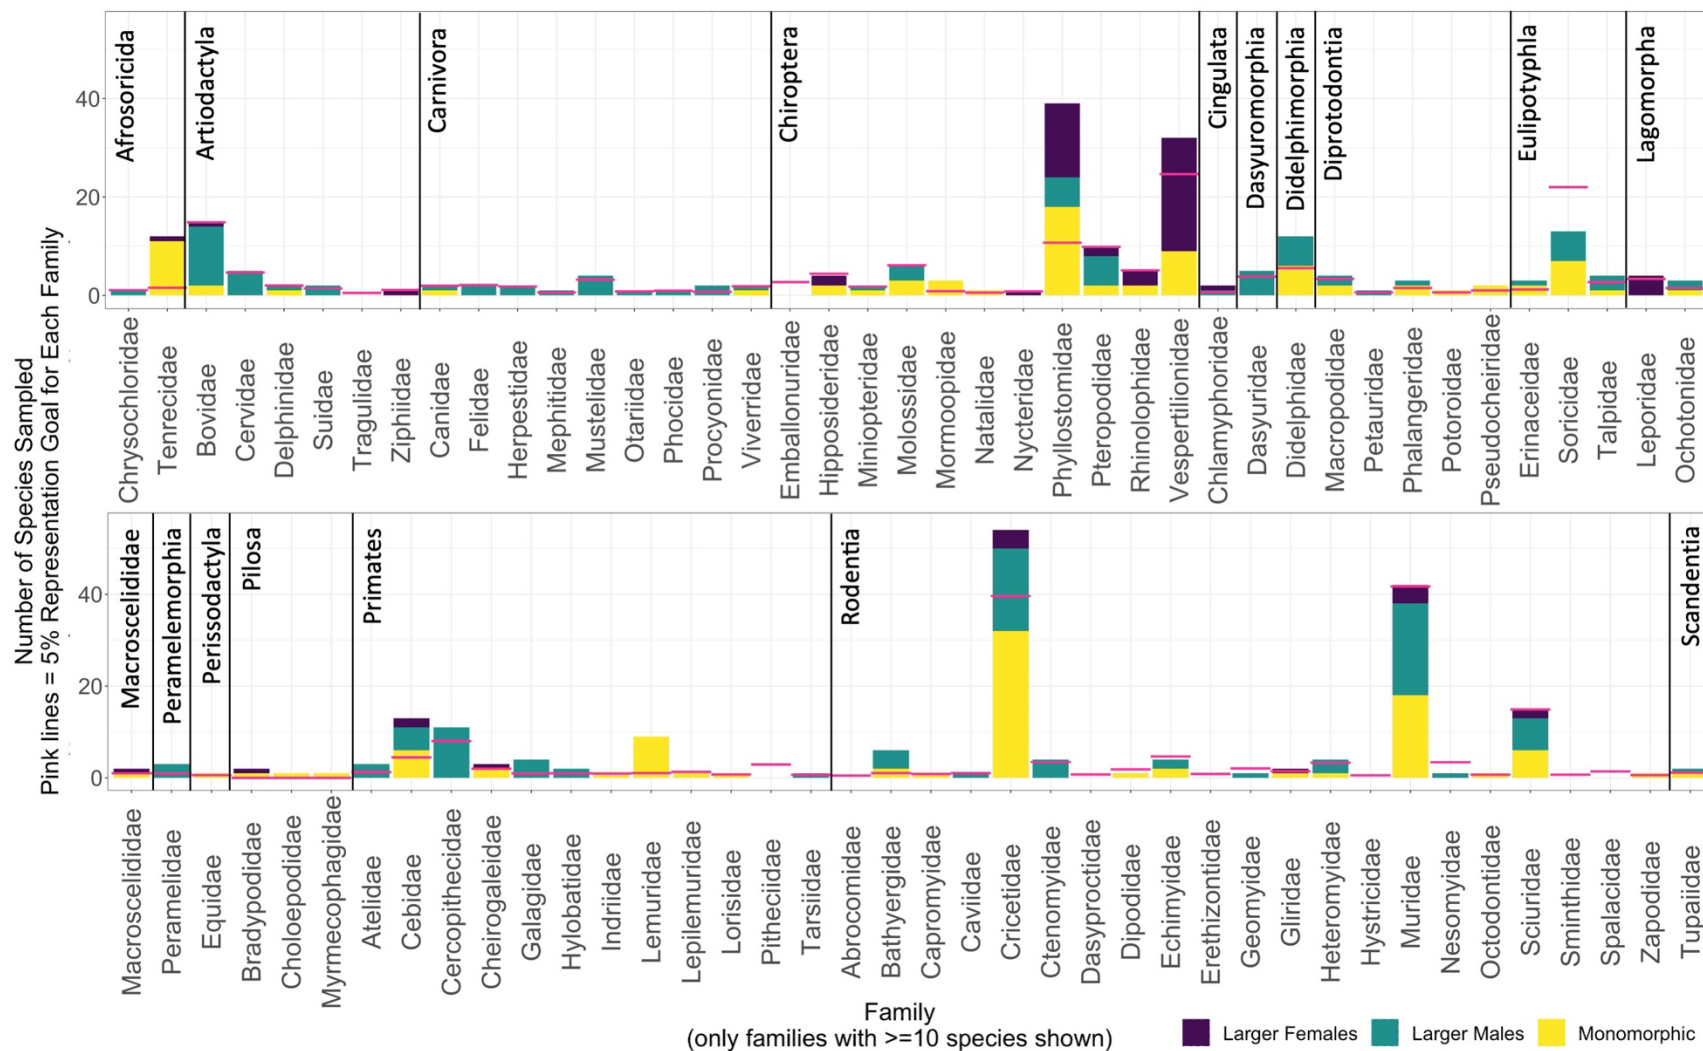

**Supplementary Table 1. Summary of sample sizes achieved for each order (in order of species richness) and family, the estimated rates of dimorphism & monomorphism in each order (percentages in bold in colored columns, representing rates calibrated by species richness in each family), and the distribution of dimorphism in the whole dataset by family (numbers in colored columns, representing the number of species in the dataset in each category). We excluded orders and families with <10 species, with the exception of Pilosa, an order of 10 species in which no family had more than 4 species, and a few cases where data from families with <10 species were included to help achieve 5% representation for the order. Under Primates, Cebidae includes Aotidae and Callitrichidae, following Burgin et al.<sup>1</sup>.**

| <b>ORDER<br/>FAMILY</b> | <b>DESCRIPTION</b>                                                   | <b># SPECIES<br/>SAMPLED/<br/># EXTANT SPECIES<br/>(% REPRESENTED)</b> | <b><u>LARGER FEMALES</u><br/>EST. % OF ORDER<br/># SPP. IN FAMILY</b> | <b><u>MONOMORPHIC</u><br/>EST. % OF ORDER<br/># SPP. IN FAMILY</b> | <b><u>LARGER MALES</u><br/>EST. % OF ORDER<br/>&amp; # SPP. IN FAMILY</b> |
|-------------------------|----------------------------------------------------------------------|------------------------------------------------------------------------|-----------------------------------------------------------------------|--------------------------------------------------------------------|---------------------------------------------------------------------------|
| <b>Rodentia</b>         | <b>Rats, mice, &amp; allies</b>                                      | <b>139/2552 (5.4%)</b>                                                 | <b>8.2%</b>                                                           | <b>47.6%</b>                                                       | <b>44.2%</b>                                                              |
| Abrocomidae             | Chinchilla rats                                                      | 0/10 (0%)                                                              | -                                                                     | -                                                                  | -                                                                         |
| Bathyergidae            | African mole rats                                                    | 6/21 (28.6%)                                                           | 0                                                                     | 2                                                                  | 4                                                                         |
| Capromyidae             | Hutias                                                               | 1/17 (5.9%)                                                            | 0                                                                     | 1                                                                  | 0                                                                         |
| Castoridae              | Beavers                                                              | 1/2 (50%)                                                              | 0                                                                     | 1                                                                  | 0                                                                         |
| Caviidae                | Cavies & maras                                                       | 1/21 (4.8%)                                                            | 0                                                                     | 0                                                                  | 1                                                                         |
| Cricetidae              | Hamsters, voles, lemmings,<br>muskrats, New World mice, &<br>rats    | 54/792 (6.8%)                                                          | 4                                                                     | 32                                                                 | 18                                                                        |
| Ctenomyidae             | Tuco-tucos                                                           | 4/69 (5.8%)                                                            | 0                                                                     | 0                                                                  | 4                                                                         |
| Dasyproctidae           | Agoutis & acouchis                                                   | 0/15 (0%)                                                              | -                                                                     | -                                                                  | -                                                                         |
| Dipodidae               | Jerboas                                                              | 1/37 (2.7%)                                                            | 0                                                                     | 1                                                                  | 0                                                                         |
| Echimyidae              | Shiny rats                                                           | 4/93 (4.3%)                                                            | 0                                                                     | 2                                                                  | 2                                                                         |
| Erethizontidae          | New World porcupines                                                 | 0/17 (0%)                                                              | -                                                                     | -                                                                  | -                                                                         |
| Geomyidae               | Gophers                                                              | 1/41 (2.4%)                                                            | 0                                                                     | 0                                                                  | 1                                                                         |
| Gliridae                | Dormice                                                              | 2/29 (6.9%)                                                            | 1                                                                     | 1                                                                  | 0                                                                         |
| Heteromyidae            | Kangaroo rats, kangaroo mice,<br>pocket mice, & spiny pocket<br>mice | 4/66 (6.1%)                                                            | 0                                                                     | 1                                                                  | 3                                                                         |
| Muridae                 | Mice, rats, & gerbils                                                | 42/834 (5%)                                                            | 4                                                                     | 18                                                                 | 20                                                                        |

|                     |                                                            |                        |              |              |              |
|---------------------|------------------------------------------------------------|------------------------|--------------|--------------|--------------|
| Nesomyidae          | Pouched rats, swamp mice, & allies                         | 1/68 (1.5%)            | 0            | 0            | 1            |
| Octodontidae        | Rock rats, coruros, degus, mountain degus, & viscacha rats | 1/14 (7.1%)            | 0            | 1            | 0            |
| Sciuridae           | Squirrels                                                  | 15/298 (5%)            | 2            | 6            | 7            |
| Sminthidae          | Birch mice                                                 | 0/14 (0%)              | -            | -            | -            |
| Spalacidae          | Blind mole-rats, bamboo rats, mole-rats, & zokors          | 0/28 (0%)              | -            | -            | -            |
| Zapodidae           | Jumping mice                                               | 1/12 (8.3%)            | 0            | 1            | 0            |
| <b>Chiroptera</b>   | <b>Bats</b>                                                | <b>104/1386 (7.5%)</b> | <b>45.7%</b> | <b>36.6%</b> | <b>17.7%</b> |
| Emballonuridae      | Sac-winged bats                                            | 0/54 (0%)              | -            | -            | -            |
| Hipposideridae      | Old World leaf-nosed bats                                  | 4/88 (4.5%)            | 2            | 2            | 0            |
| Miniopteridae       | Bent-winged & long-winged bats                             | 2/35 (5.7%)            | 0            | 1            | 1            |
| Molossidae          | Free-tailed bats                                           | 6/122 (4.9%)           | 0            | 3            | 3            |
| Mormoopidae         | Mustached, ghost-faced, & naked-backed bats                | 3/17 (17.6%)           | 0            | 3            | 0            |
| Natalidae           | Funnel-eared bats                                          | 1/11 (9.1%)            | 0            | 1            | 0            |
| Noctilionidae       | Bulldog bats                                               | 1/2 (50%)              | 0            | 0            | 1            |
| Nycteridae          | Slit-faced bats                                            | 1/16 (6.3%)            | 1            | 0            | 0            |
| Phyllostomidae      | New World leaf-nosed bats                                  | 39/214 (18.2%)         | 15           | 18           | 6            |
| Pteropodidae        | Old World fruit bats, flying foxes                         | 10/197 (5.1%)          | 2            | 2            | 6            |
| Rhinolophidae       | Horseshoe bats                                             | 5/102 (4.9%)           | 3            | 2            | 0            |
| Vespertilionidae    | Vesper bats                                                | 32/493 (6.5%)          | 23           | 9            | 0            |
| <b>Artiodactyla</b> | <b>Even-toed ungulates</b>                                 | <b>30/551 (5.4%)</b>   | <b>8.3%</b>  | <b>12.5%</b> | <b>79.2%</b> |
| Bovidae             | Buffalo, antelopes, goat-antelopes, & allies               | 15/297 (5.1%)          | 1            | 2            | 12           |
| Cervidae            | True deer & allies                                         | 5/93 (5.4%)            | 0            | 0            | 5            |
| Delphinidae         | Dolphins                                                   | 2/40 (5%)              | 0            | 1            | 1            |
| Phocoenidae         | Porpoises                                                  | 2/7 (28.6%)            | 1            | 0            | 1            |
| Pontoporiidae       | The La Plata dolphin                                       | 1/1 (100%)             | 0            | 1            | 0            |
| Suidae              | Pigs                                                       | 2/28 (7.1%)            | 0            | 0            | 2            |

|                     |                                                                                                                                  |                      |             |              |              |
|---------------------|----------------------------------------------------------------------------------------------------------------------------------|----------------------|-------------|--------------|--------------|
| Tayassuidae         | Peccaries                                                                                                                        | 2/5 (40%)            | 0           | 2            | 0            |
| Tragulidae          | Chevrotains                                                                                                                      | 0/10 (0%)            | -           | -            | -            |
| Ziphiidae           | Beaked whales                                                                                                                    | 1/22 (4.5%)          | 1           | 0            | 0            |
| <b>Eulipotyphla</b> | <b>Hedgehogs, moles, shrews, &amp; allies</b>                                                                                    | <b>20/527 (3.8%)</b> | <b>0%</b>   | <b>49.6%</b> | <b>50.4%</b> |
| Erinaceidae         | Hedgehogs & moonrats                                                                                                             | 3/24 (12.5%)         | 0           | 2            | 1            |
| Soricidae           | Shrews                                                                                                                           | 13/440 (3%)          | 0           | 7            | 6            |
| Talpidae            | Moles                                                                                                                            | 4 /54 (7.4%)         | 0           | 1            | 3            |
| <b>Primates</b>     | <b>Lemurs, monkeys, apes, &amp; allies</b>                                                                                       | <b>50/518 (9.7%)</b> | <b>5.7%</b> | <b>32.7%</b> | <b>61.6%</b> |
| Atelidae            | Howler, spider, woolly, & woolly spider monkeys                                                                                  | 3/23 (13%)           | 0           | 0            | 3            |
| Cebidae             | Capuchins & squirrel monkeys, combined here with night monkeys (Aotidae) & marmosets, tamarins, & lion tamarins (Callitrichidae) | 13/89 (14.6%)        | 2           | 6            | 5            |
| Cercopithecidae     | Old World monkeys                                                                                                                | 11/160 (6.9%)        | 0           | 0            | 11           |
| Cheirogaleidae      | Dwarf & mouse lemurs                                                                                                             | 3/40 (7.5%)          | 1           | 2            | 0            |
| Galagidae           | Bush babies                                                                                                                      | 4/20 (20%)           | 0           | 0            | 4            |
| Hominidae           | Great apes                                                                                                                       | 1/7 (14.3%)          | 0           | 0            | 1            |
| Hylobatidae         | Gibbons                                                                                                                          | 2/20 (10%)           | 0           | 0            | 2            |
| Indriidae           | Wooly lemurs & sifakas                                                                                                           | 1/19 (5.3%)          | 0           | 1            | 0            |
| Lemuridae           | True lemurs, wooly lemurs, & allies                                                                                              | 9/21 (4.3%)          | 0           | 9            | 0            |
| Lepilemuridae       | Sportive lemurs                                                                                                                  | 1/26 (3.8%)          | 0           | 1            | 0            |
| Lorisidae           | Lorises, pottos, & angwantibos                                                                                                   | 1/15 (6.7%)          | 0           | 1            | 0            |
| Pitheciidae         | Titis, sakis, & uakaris                                                                                                          | 0/58 (0%)            | -           | -            | -            |
| Tarsiidae           | Tarsiers                                                                                                                         | 1/13 (7.7%)          | 0           | 0            | 1            |
| <b>Carnivora</b>    | <b>Cat-like &amp; dog-like carnivores</b>                                                                                        | <b>20/305 (6.6%)</b> | <b>0%</b>   | <b>13.3%</b> | <b>86.7%</b> |
| Canidae             | Dogs, foxes, & allies                                                                                                            | 2/39 (5.1%)          | 0           | 1            | 1            |
| Eupleridae          | Malagasy carnivores                                                                                                              | 3/8 (37.5%)          | 0           | 1            | 2            |

|                        |                                                  |                       |              |              |              |
|------------------------|--------------------------------------------------|-----------------------|--------------|--------------|--------------|
| Felidae                | Cats                                             | 2/42 (4.8%)           | 0            | 0            | 2            |
| Herpestidae            | Mongoose                                         | 2/36 (5.6%)           | 0            | 0            | 2            |
| Mephitidae             | Skunks                                           | 1/12 (8.3%)           | 0            | 0            | 1            |
| Mustelidae             | Weasels, otters, badgers & allies                | 4/64 (6.3%)           | 0            | 0            | 4            |
| Otariidae              | Eared seals                                      | 1/16 (6.3%)           | 0            | 0            | 1            |
| Phocidae               | Earless seals                                    | 1/19 (5.3%)           | 0            | 0            | 1            |
| Procyonidae            | Racoons, ringtails, coatis & allies              | 2/14 (14.3%)          | 0            | 0            | 2            |
| Viverridae             | Civets, genets, & allies                         | 2/37 (5.4%)           | 0            | 1            | 1            |
| <b>Diprotodontia</b>   | <b>Kangaroos, koalas, &amp; allies</b>           | <b>14/155 (9%)</b>    | <b>0%</b>    | <b>60.3%</b> | <b>39.7%</b> |
| Burramyidae            | Pygmy possums                                    | 1/5 (20%)             | 0            | 1            | 0            |
| Macropodidae           | Kangaroos, wallabies, quokkas & allies           | 4/67 (6%)             | 0            | 2            | 2            |
| Petauridae             | Trioks & gliders                                 | 1/12 (8.3%)           | 0            | 0            | 1            |
| Phalangeridae          | Cuscus & brushtail possums                       | 3/30 (10%)            | 0            | 2            | 1            |
| Phascolarctidae        | Koalas                                           | 1/1 (100%)            | 0            | 0            | 1            |
| Potoroidae             | Bettongs, potoroos, & rat-kangaroos              | 1/12 (8.3%)           | 0            | 1            | 0            |
| Pseudocheiridae        | Ringtail possums & allies                        | 2/20 (10%)            | 0            | 2            | 0            |
| Vombatidae             | Wombats                                          | 1/3 (33.3%)           | 0            | 0            | 1            |
| <b>Didelphimorphia</b> | <b>Opossums</b>                                  | <b>12/111 (10.8%)</b> | <b>0%</b>    | <b>50.2%</b> | <b>49.8%</b> |
| Didelphidae            | Opossums                                         | 12/111 (10.8%)        | 0            | 6            | 6            |
| <b>Lagomorpha</b>      | <b>Rabbits, pikas, &amp; hares</b>               | <b>7/98 (7.1%)</b>    | <b>60.0%</b> | <b>13.5%</b> | <b>26.5%</b> |
| Leporidae              | Rabbits & hares                                  | 4/67 (6%)             | 4            | 0            | 0            |
| Ochotonidae            | Pikas                                            | 3/30 (10%)            | 0            | 1            | 2            |
| <b>Dasyuromorphia</b>  | <b>Carnivorous Australian marsupials</b>         | <b>5/78 (6.4%)</b>    | <b>0%</b>    | <b>0%</b>    | <b>100%</b>  |
| Dasyuridae             | Carnivorous Australian marsupials                | 5/76 (6.6%)           | 0            | 0            | 5            |
| <b>Afrosoricida</b>    | <b>Tenrecs, otter shrews, &amp; golden moles</b> | <b>13/55 (23.6%)</b>  | <b>5.5%</b>  | <b>61.2%</b> | <b>33.3%</b> |

|                        |                                 |                    |              |              |              |
|------------------------|---------------------------------|--------------------|--------------|--------------|--------------|
| Chrysochloridae        | Golden moles                    | 1/21 (4.8%)        | 0            | 0            | 1            |
| Tenrecidae             | Tenrecs                         | 12/31 (38.7%)      | 1            | 11           | 0            |
| <b>Macroscelidea</b>   | <b>Elephant shrews</b>          | <b>2/30 (6.7%)</b> | <b>52.0%</b> | <b>48.0%</b> | <b>0%</b>    |
| Macroscelididae        | Elephant shrews                 | 2/30 (6.7%)        | 1            | 1            | 0            |
| <b>Scandentia</b>      | <b>Treeshrews</b>               | <b>2/24 (8.3%)</b> | <b>0%</b>    | <b>47.7%</b> | <b>52.3%</b> |
| Tupaiaidae             | Treeshrews                      | 2/23 (8.7%)        | 0            | 1            | 1            |
| <b>Peramelemorphia</b> | <b>Bandicoots &amp; bilbies</b> | <b>3/23 (13%)</b>  | <b>0%</b>    | <b>0%</b>    | <b>100%</b>  |
| Peramelidae            | Bandicoots                      | 3/20 (15%)         | 0            | 0            | 3            |
| <b>Perissodactyla</b>  | <b>Odd-toed ungulates</b>       | <b>1/21 (0%)</b>   | <b>0%</b>    | <b>100%*</b> | <b>0%</b>    |
| Equidae                | Horses, zebras, & asses         | 1/12 (0%)          | 0            | 1            | 0            |
| Rhinocerotidae         | Rhinoceroses                    | 0/5 (0%)           | -            | -            | -            |
| Tapiridae              | Tapirs                          | 0/4 (0%)           | -            | -            | -            |
| <b>Cingulata</b>       | <b>Armadillos</b>               | <b>3/20 (15%)</b>  | <b>52.7%</b> | <b>0%</b>    | <b>47.3%</b> |
| Chlamyphoridae         | Armadillos                      | 2/13 (15%)         | 1            | 0            | 1            |
| Dasypodidae            | Armadillos                      | 1/7 (14.3%)        | 0            | 1            | 0            |
| <b>Pilosa</b>          | <b>Anteaters &amp; sloths</b>   | <b>4/10 (40%)</b>  | <b>21.9%</b> | <b>78.1%</b> | <b>0%</b>    |
| Bradypodidae           | Three-toed sloths               | 2/4 (50%)          | 1            | 1            | 0            |
| Choloepodidae          | Two-toed sloths                 | 1/1 (100%)         | 0            | 1            | 0            |
| Cylcopedidae           | Silky anteater                  | 0/1 (0%)           | -            | -            | -            |
| Myrmecophagidae        | Anteaters                       | 1/3 (33%)          | 0            | 1            | 0            |

\*While we found only one study on perissodactyls that met our criteria for inclusion in analyses (on plains zebras, *Equus quagga*, which were found to be monomorphic<sup>2</sup>), several studies reported data or analyses indicating monomorphism in other perissodactyls (Przewalski's horses, *Equus ferus*<sup>3</sup>, Indian rhinoceros, *Rhinoceros unicornis*<sup>4</sup>, black rhinoceros, *Diceros bicornis*<sup>5</sup>, and South American tapirs, *Tapirus terrestris*<sup>6</sup>).

## References

1. Burgin, C. J., Colella, J. P., Kahn, P. L. & Upham, N. S. How many species of mammals are there? *J. Mammal.* **99**, 1–14 (2018).
2. Smuts, G. L. Pre- and postnatal growth phenomena of Burchell's zebra *Equus burchelli antiquorum*. *Koedoe* **18**, 69–102 (1975).
3. Allen, J. L. Immobilization of Mongolian wild horses (*Equus przewalskii przewalskii*) with carfentanil and antagonism with naltrexone. *J. Zoo Wildl. Med.* **23**, 422–425 (1992).
4. Harthoorn, A. M. Capture of the white (square-lipped) rhinoceros *Ceratotherium simum simum* (Burchell) with the use of drug immobilization technique. *Can. J. Comp. Med. Vet. Sci.* **26**, 203–8 (1962).
5. Berger, J. & Cunningham, C. Predation, sensitivity, and sex: why female black rhinoceroses outlive males. *Behav. Ecol.* **6**, 57–64 (1995).
6. Gonçalves, F. *et al.* Atlantic Mammal Traits: a data set of morphological traits of mammals in the Atlantic Forest of South America. *Ecology* **99**, 498 (2018).
